# Supplementary material
Source: publisher figshare collection journal article supplement (https://sage.figshare.com/ndownloader/files/17682443)
Supplement: Supplementary file 1 [file 17682443]

## Appendix A

### Sample Visual Map for Alexa's First Lesson

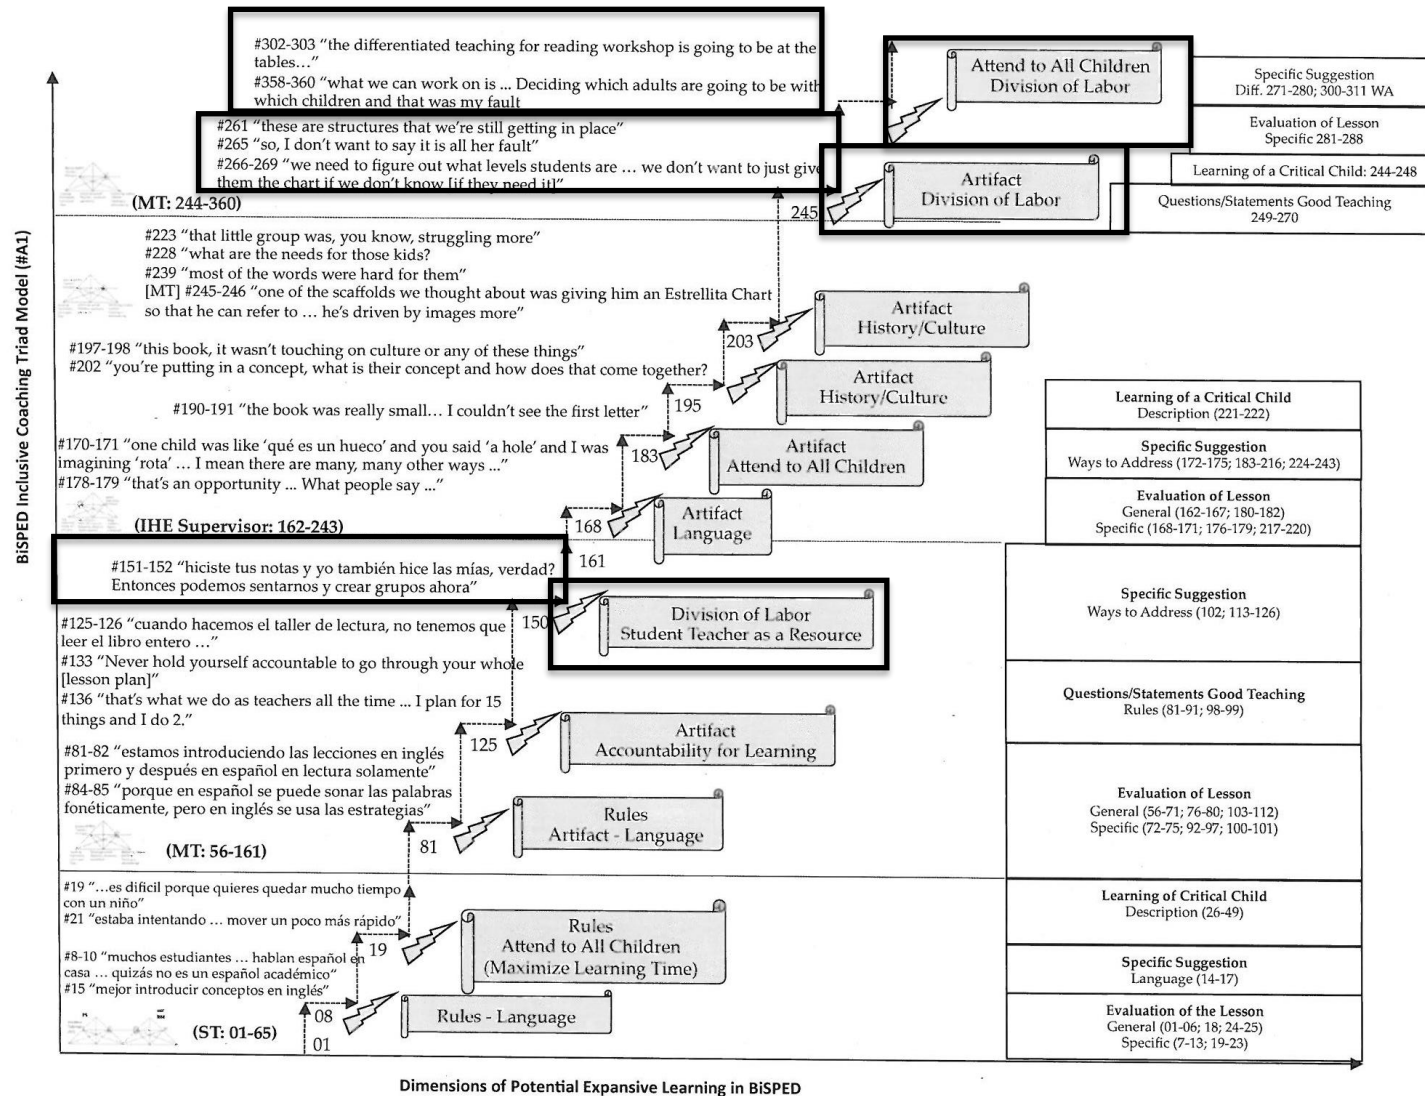

## Appendix B

### Data Episodes Across Historical Tensions (Dynamics)

| Teacher Candidate | Discursive Episodes in Tension 1<br>(not distributing load - not “holding the center”)                                                                                                                                                                                                               | Discursive Episodes in Tension 2<br>(lack of opportunities for children’s agency)                                                                                                                                                                                                                                                                                                                                                          | Total Number Tensions |
|-------------------|------------------------------------------------------------------------------------------------------------------------------------------------------------------------------------------------------------------------------------------------------------------------------------------------------|--------------------------------------------------------------------------------------------------------------------------------------------------------------------------------------------------------------------------------------------------------------------------------------------------------------------------------------------------------------------------------------------------------------------------------------------|-----------------------|
| A1                | -Organize who is collecting learning data and how this is going to be shared/used for instruction<br>-Determine children that need additional artifacts to learn (and form of needed teaching artifacts)<br>-Decide who is going to work with each student, or group of students ahead of the lesson | 0                                                                                                                                                                                                                                                                                                                                                                                                                                          | 3                     |
| A3                | 0                                                                                                                                                                                                                                                                                                    | -Teaching children to be independent; helping them learn to be learners<br>-Need time for sharing so that children learn from each other, not only from teacher<br>-Bring/integrate knowledge from the home. The role of family in school and in children’s learning                                                                                                                                                                       | 3                     |
| R1                | -Leading teacher must carefully prepare the lesson, anticipate questions and topics; while children need to be encouraged to listen carefully and participate by raising hand                                                                                                                        | 0                                                                                                                                                                                                                                                                                                                                                                                                                                          | 1                     |
| R2                | -TC must teach individual students who need help (whole group teaching only is not sufficient)                                                                                                                                                                                                       | 0                                                                                                                                                                                                                                                                                                                                                                                                                                          | 1                     |
| R3                | 0                                                                                                                                                                                                                                                                                                    | 0                                                                                                                                                                                                                                                                                                                                                                                                                                          | 0                     |
| Y1                | -Pay attention to what others are doing to realize the learning that is happening and build on it                                                                                                                                                                                                    | -Letting go of excessive control of the classroom, so that you can do other types of activities<br>-Not about controlling the children (building their sense of learning; caring for their actual learning)<br>-Children should have time for them to work independently and in groups<br>-Children should have more ownership in their learning (letting them speak more)<br>-More shifted to how children learn (teaching them to learn) | 6                     |
| Y2                | 0                                                                                                                                                                                                                                                                                                    | -Allow children to learn on their own by modeling and having them study your model, not correcting<br>-Opportunities for children to create their own ways of learning - gradually release responsibility                                                                                                                                                                                                                                  | 2                     |
| L1                | 0                                                                                                                                                                                                                                                                                                    | 0                                                                                                                                                                                                                                                                                                                                                                                                                                          | 0                     |
| L2                | -Mentor realized children didn’t have the necessary pre-knowledge they should have had<br>-The need to carefully analyze teaching artifacts to make sure they will help children learn                                                                                                               | 0                                                                                                                                                                                                                                                                                                                                                                                                                                          | 2                     |
| L3                | 0                                                                                                                                                                                                                                                                                                    | 0                                                                                                                                                                                                                                                                                                                                                                                                                                          | 0                     |
|                   | 8 Discursive Episodes in Tension 1                                                                                                                                                                                                                                                                   | 10 Discursive Episodes in Tension 2                                                                                                                                                                                                                                                                                                                                                                                                        | Total: 18             |
